# Supplementary material for: Single-cell transcriptome and translatome dual-omics reveals potential mechanisms of human oocyte maturation
Source: PubMed Central journal article supplement (PMC9427852; doi:10.1038/s41467-022-32791-2), 2022-08-30
Supplement: 41467_2022_32791_MOESM1_ESM.pdf [file 41467_2022_32791_MOESM1_ESM.pdf]

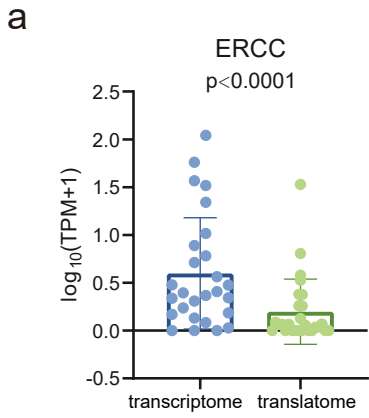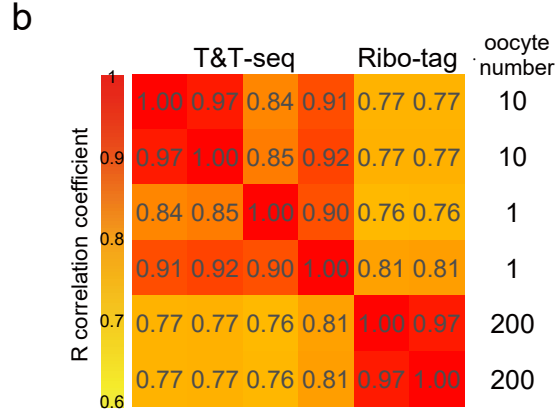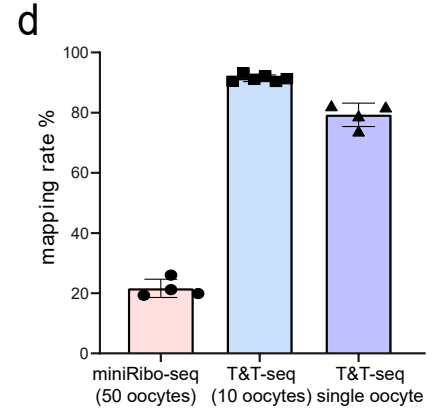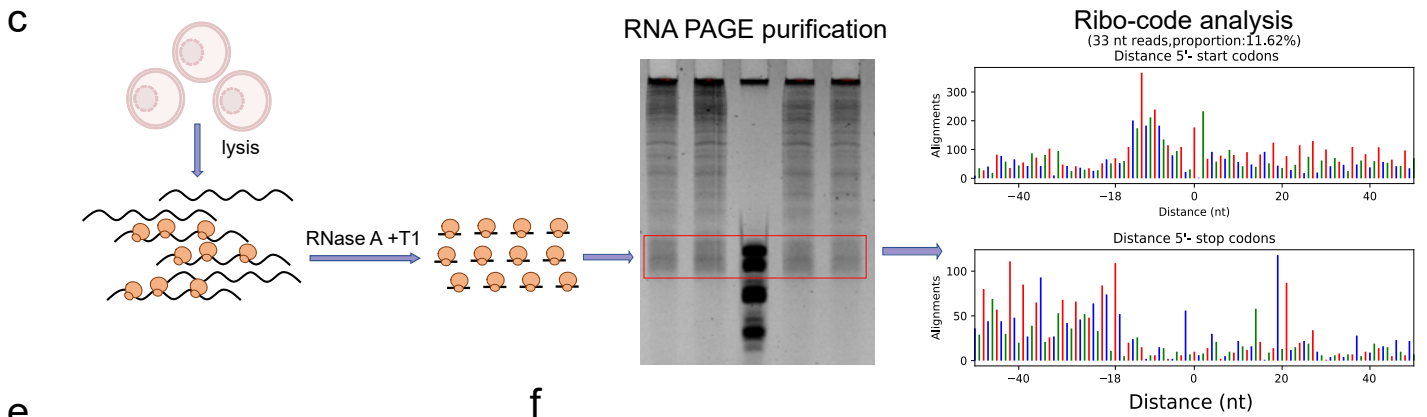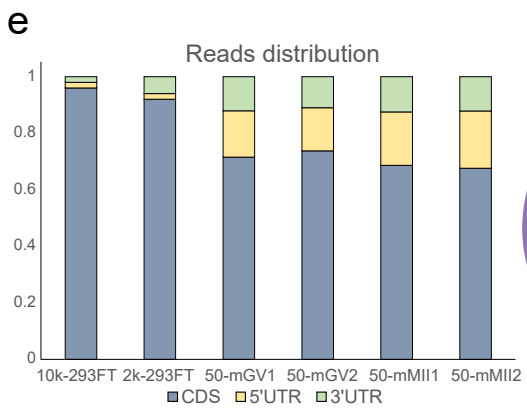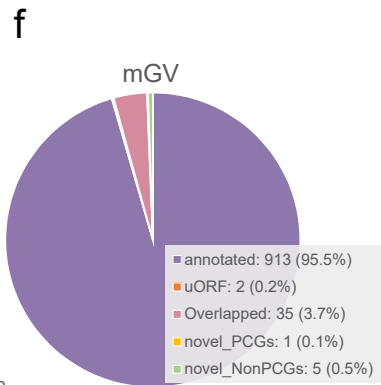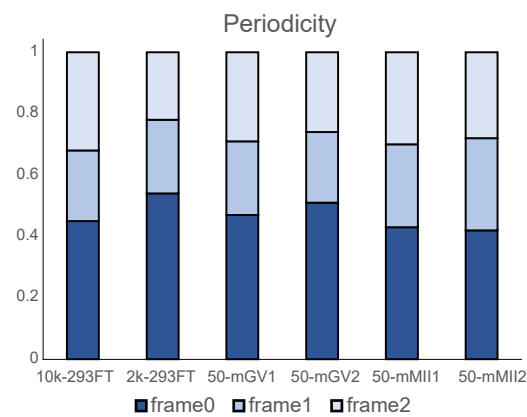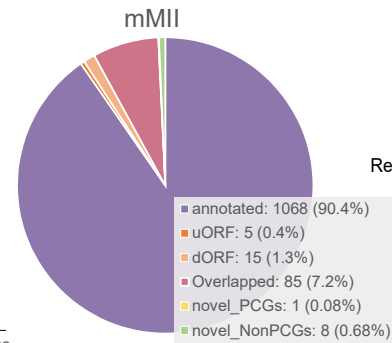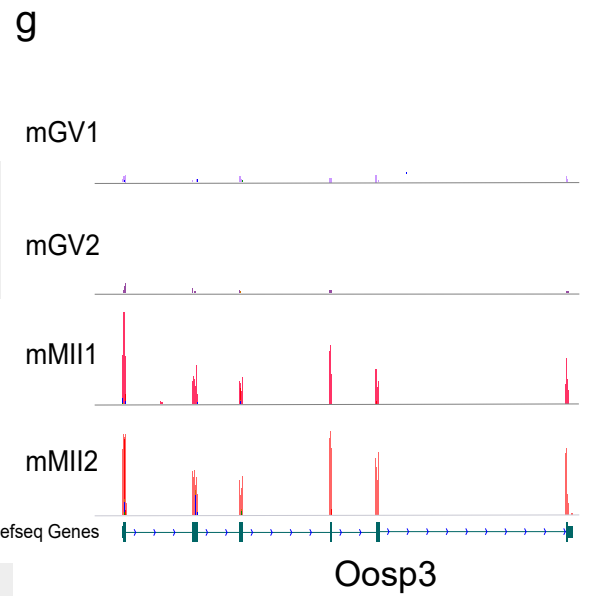

**Supplementary Fig.1** Validation experiments for T&T-seq. (a) ERCC spike-in experiment to estimate false positive rate of Ribolace; Each dot represent one ERCC RNA. Data are presented as mean values +/- SD, pair two-tail t-test. (b) Correlation coefficient heatmap of T&T-seq and Ribo-tag (published) sequencing data. (c) Schematic diagram showing the procedures of miniRibo-seq. Single nucleotide resolution of 3-nt periodicity analyzed by RiboCode are shown on the right. Created with BioRender.com. (d) Comparison of mapping rate of miniRibo-seq and T&T-seq. 4 biological replicates in miniRibo-seq, 6 biological replicates in 10 oocytes T&T-seq, 4 biological replicates in single oocyte T&T-seq. error bar, SD. (e) Reads distribution analysis and periodicity analysis of miniRibo-seq of different cell types and cell num-bers. 293FT cells (10,000 and 2,000 cell), mouse oocytes (50 oocytes). (f) ORFs distribution analysis of miniRibo-seq data analyzed by RiboCode. (g) Example of miniRibo-seq read distribution at the mouse Oosp3 gene locus.

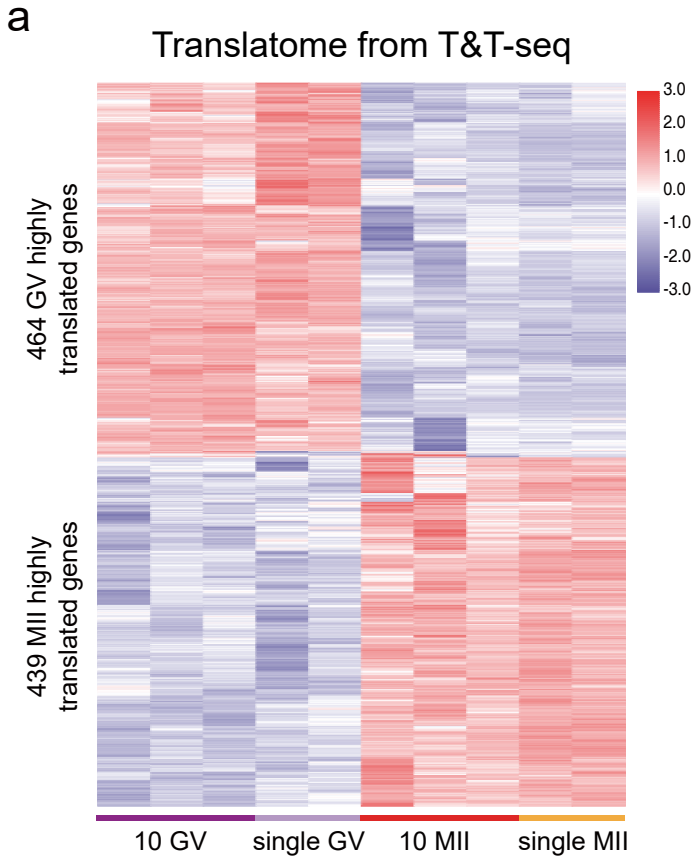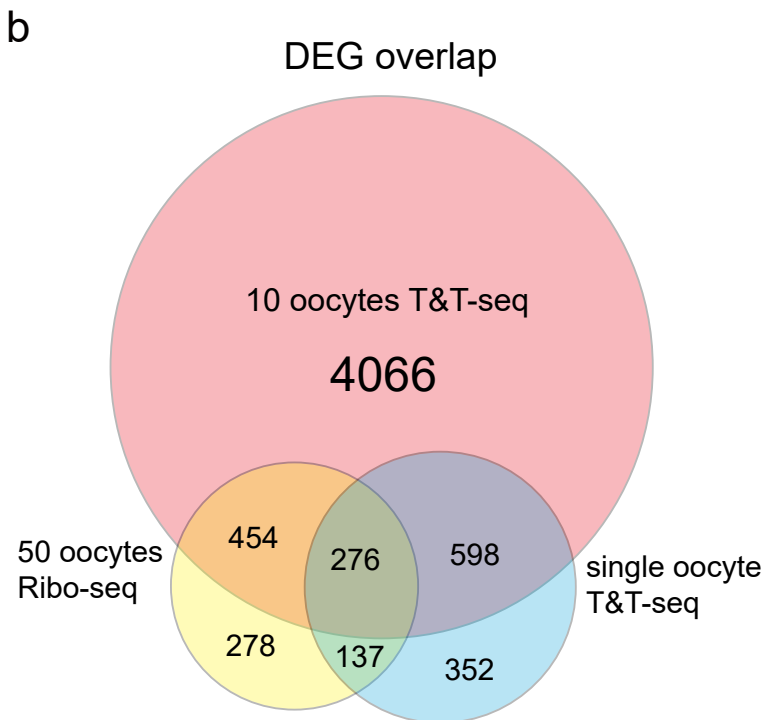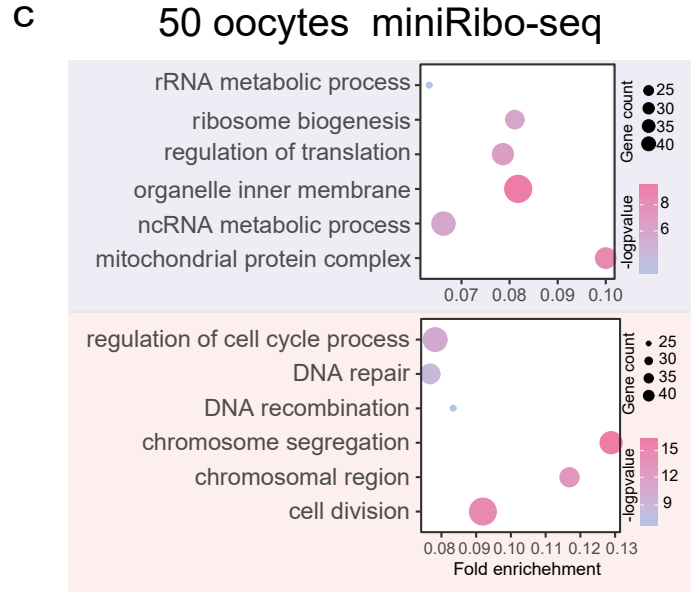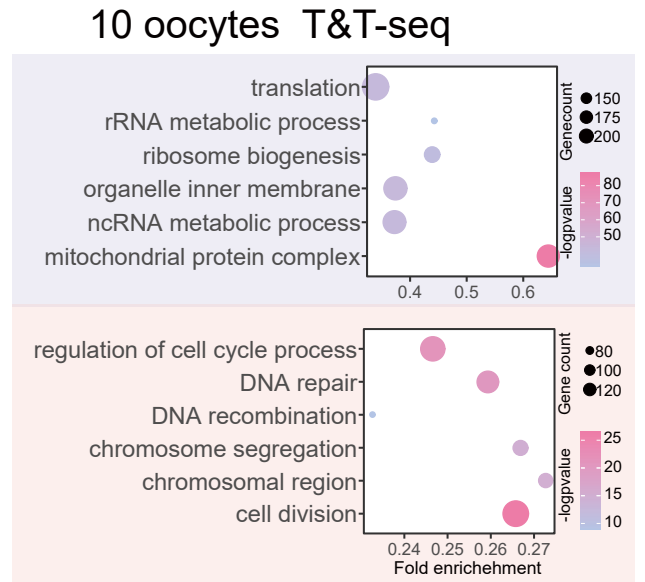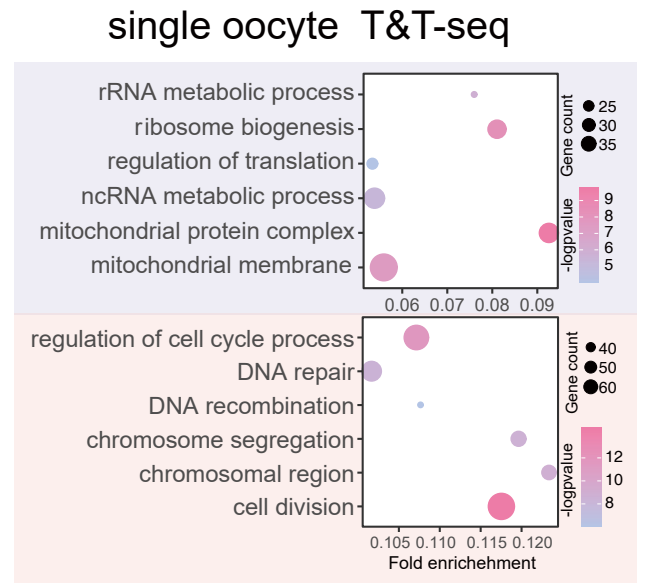

**Supplementary Fig.2** Comparisons of mouse-oocyte translomes produced by different methods. (a) Expression heatmap of DEGs during mouse oocyte maturation identified by T&T-seq (10 and single oocyte)  $p < 0.05$ , Wald test,  $\log_2$  foldchange  $> 1$ . (b) Venn plot showing the overlap of DEGs between 10 oocytes T&T-seq, single oocytes T&T-seq and 50 oocytes miniRibo-seq. (c) Representative GO enrichment of upregulated DEGs identified by miniRibo-seq (50 oocytes) and T&T-seq(10 or single oocyte). Blue background covers terms enriched in GV oocytes, red background covers MII oocytes ( $p$  value, hypergeometric test).

**a**

## Genes highly translated in GV oocytes

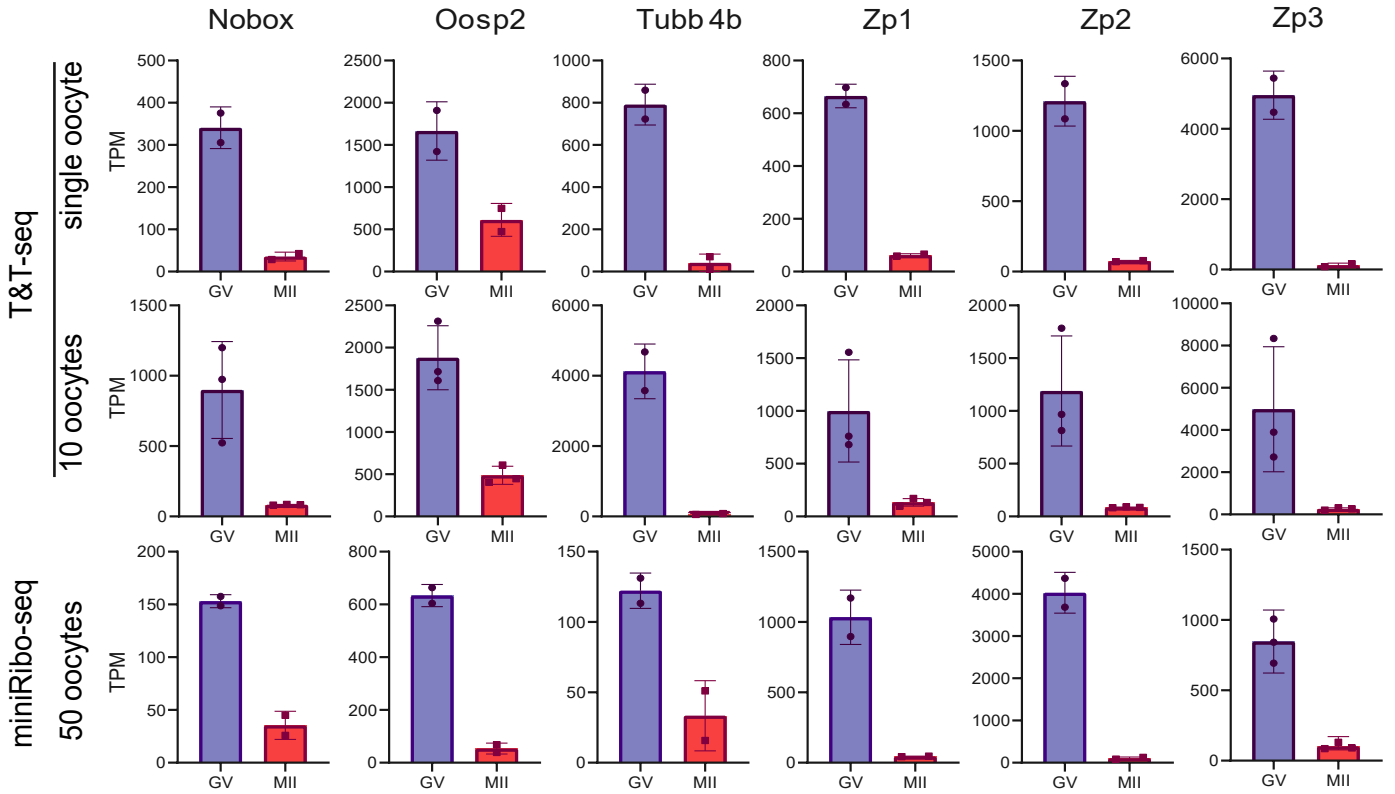**b**

## Genes highly translated in MII oocytes

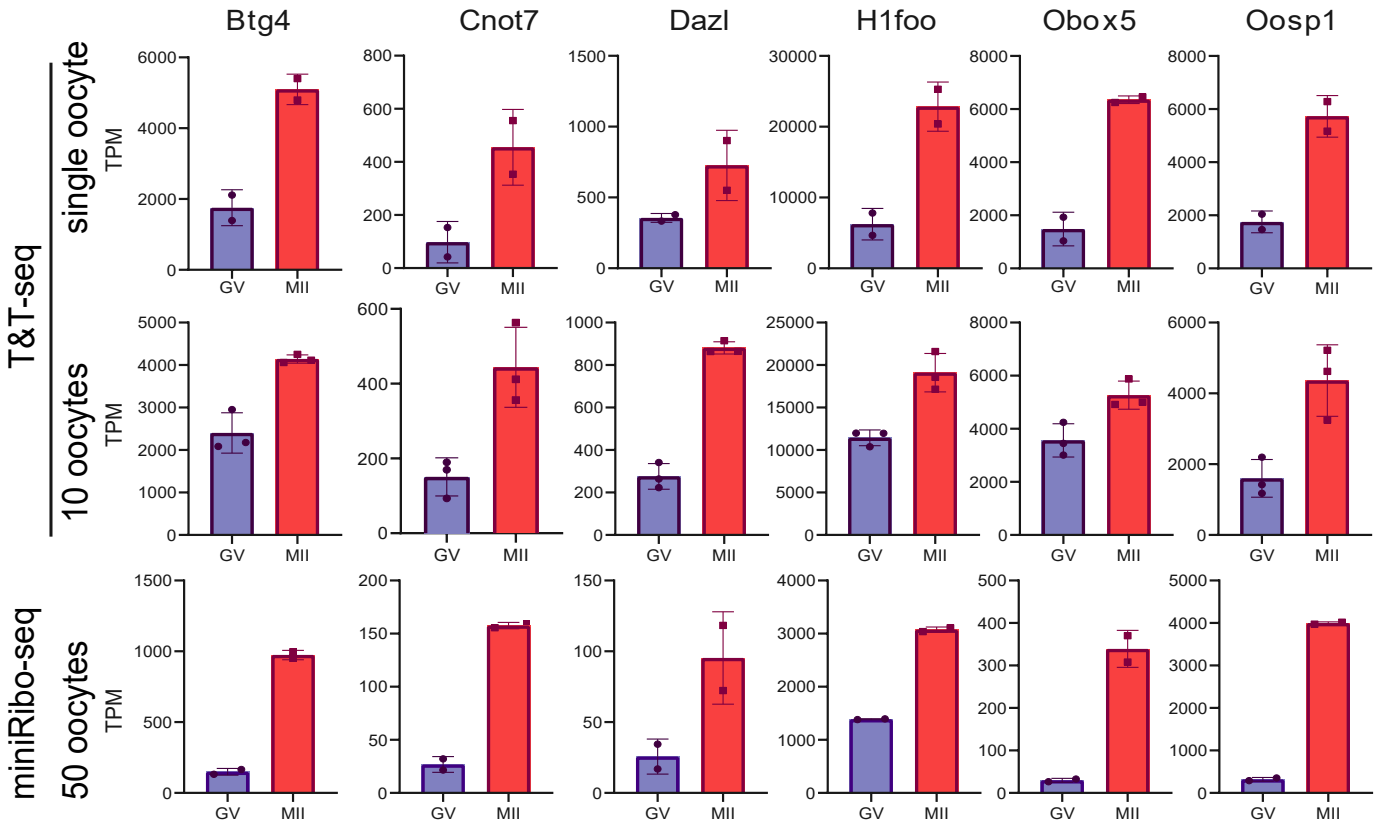

**Supplementary Fig.3** Translational expression levels of T&T-seq and miniRibo-seq of genes highly translated in GV and MII oocytes. (a) Comparison of translational expression levels of T&T-seq and miniRibo-seq of genes highly translated in GV oocytes. (b) Comparison of translational expression levels of T&T-seq and miniRibo-seq of genes highly translated in MII oocytes. 2 biological replicates in miniRibo-seq, 3 biological replicates in 10 oocytes T&T-seq, 2 biological replicates in single oocyte T&T-seq. Data are presented as mean values +/- SD.

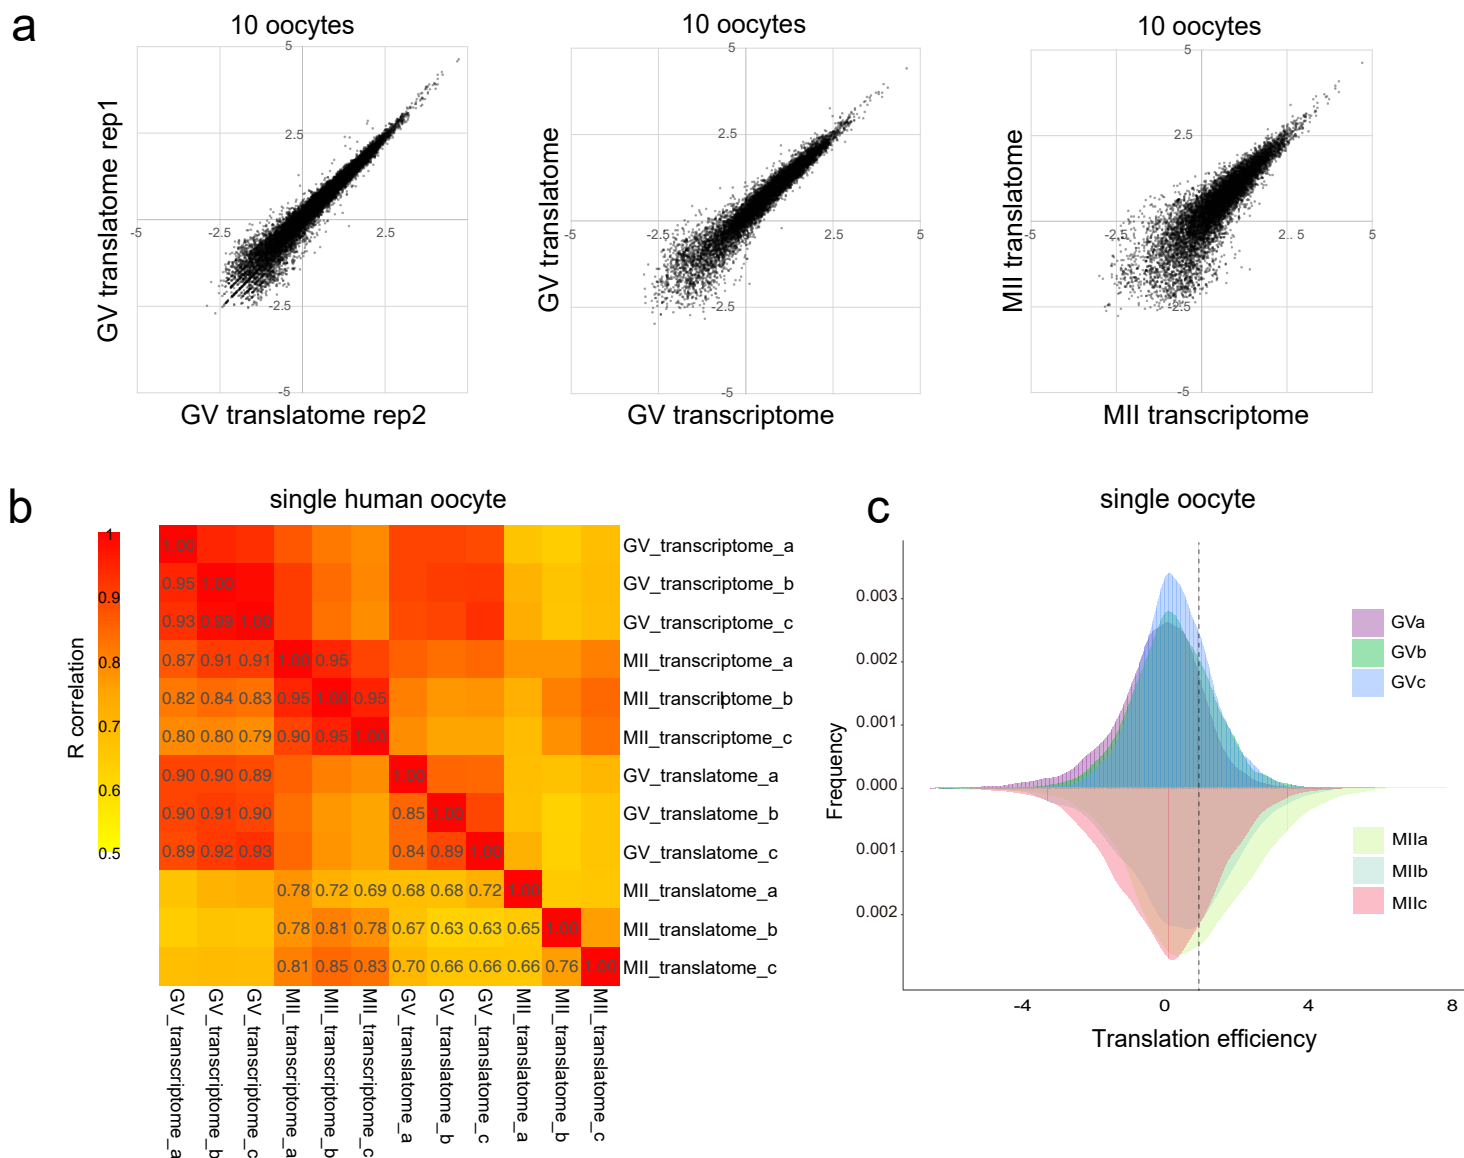

**Supplementary Fig.4** T&T variability and diversity in human GV and MII oocytes. (a) Scatter plots showing the expression of transcriptome versus translome in 10 oocyte samples. Genes expression are represented by  $\log_2(\text{TPM}+1)$ . (b) Correlation coefficient heatmap showing the correlations of transcription and translation among single human GV or MII oocytes. (c) Frequency distribution histogram of the translation efficiency of single human oocytes. Upper: GV oocytes. Lower: MII oocytes.

### class I

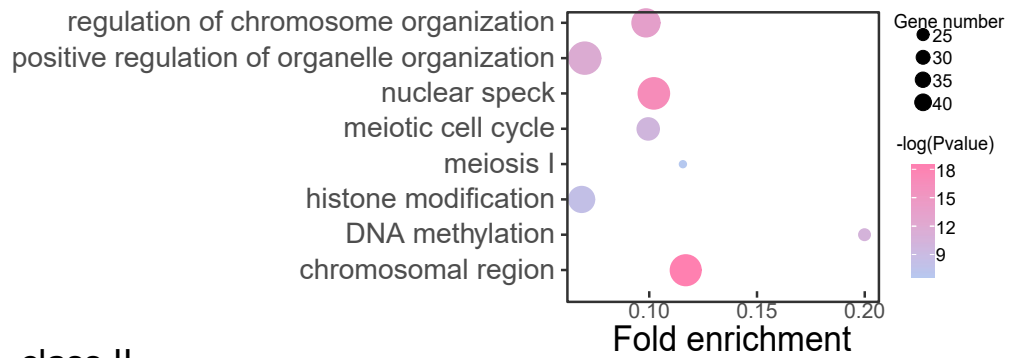

### class II

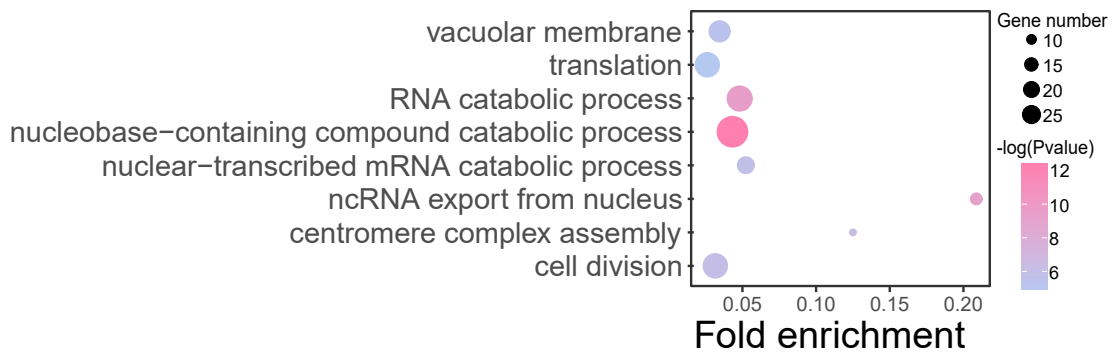

### class III

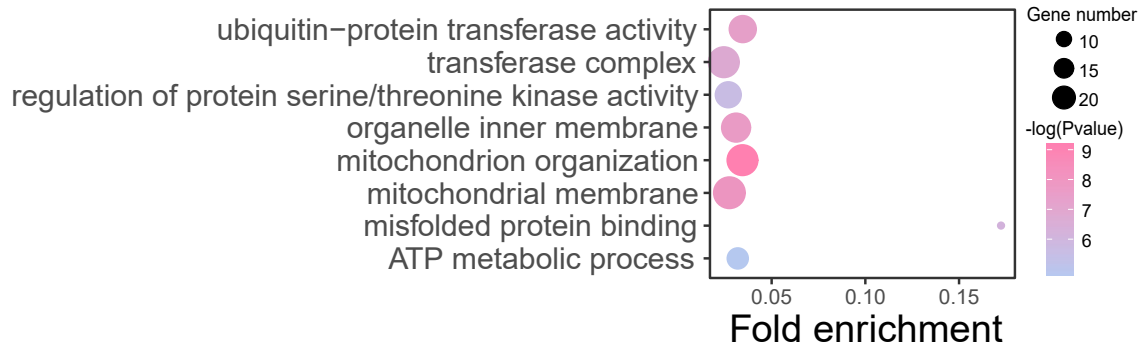

### class IV

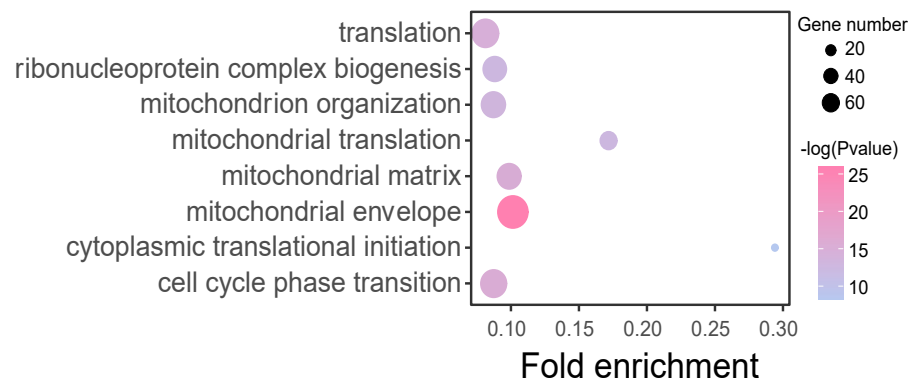

**Supplementary Fig.5** Representative GO terms of different classes of genes according to the T&T analysis of human GV versus MII oocytes. (p value, hypergeometric test)



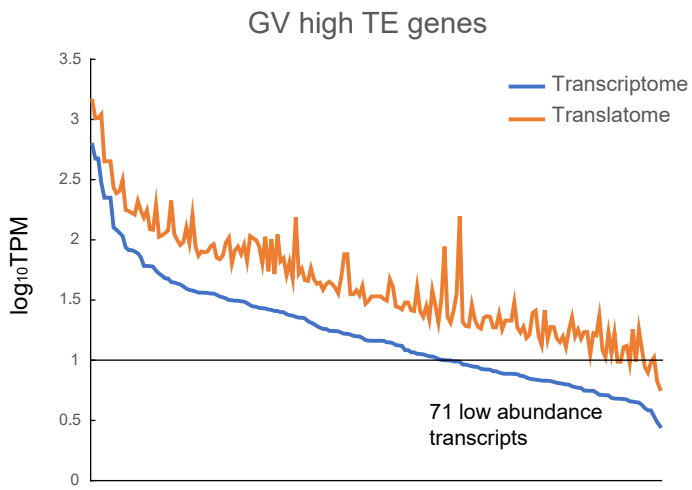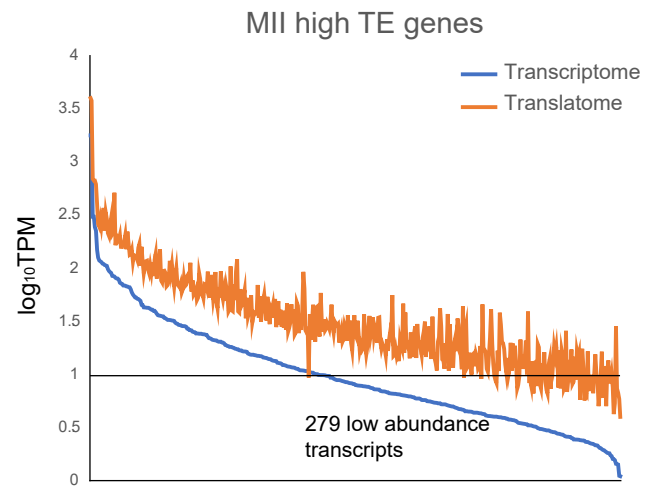

**Supplementary Fig.6** Abundance analysis of high TE genes in human GV and MII oocytes.

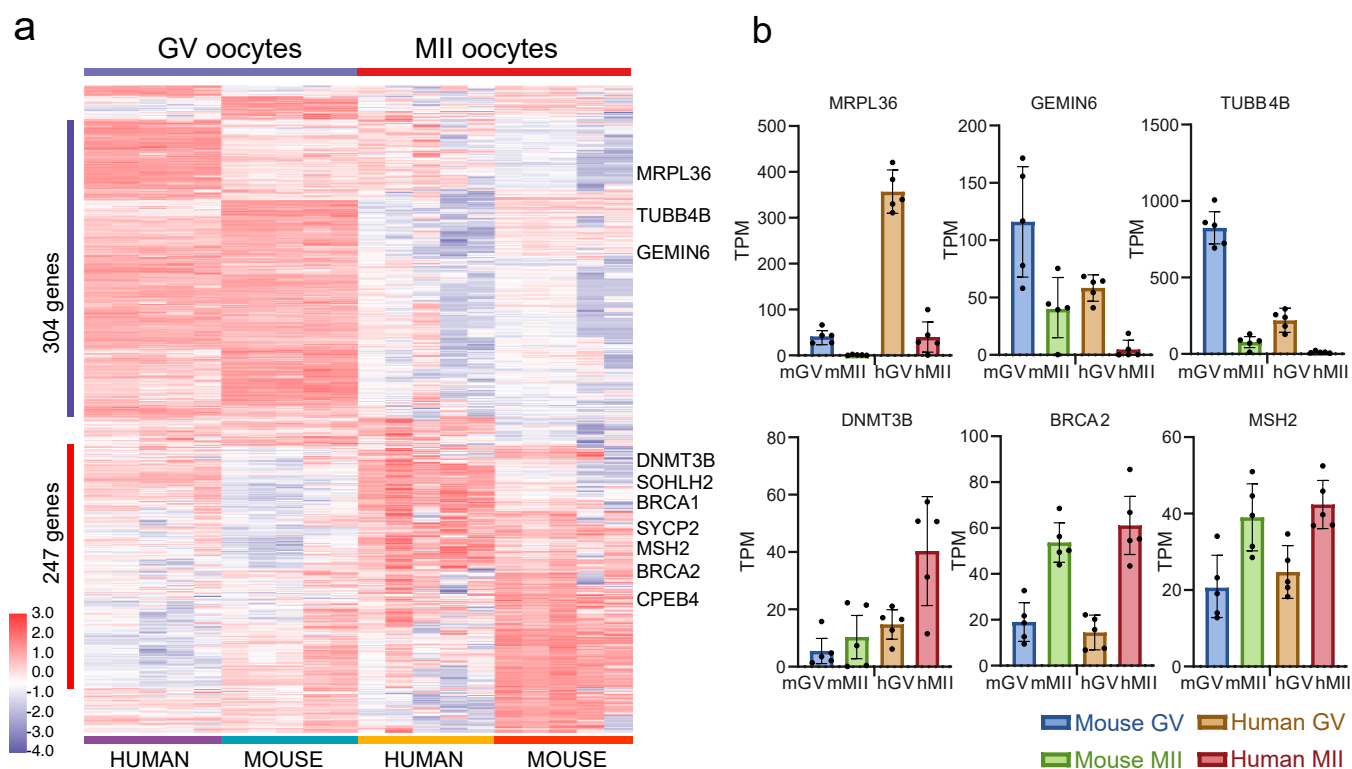

**Supplementary Fig.7** Translatome consistency between human and mouse oocytes. (a) Representative gene expression heatmap of unique translated DEGs based on human expression patterns. Selective human MII enriched genes are labeled on the right. (b) Translational expression levels of the representative genes of human and mouse GV and MII oocytes. 5 biological replicates of human and mouse oocytes. Data are presented as mean values +/- SD, Unpaired two-sided t-test.

| RBP name | Motif                                                                               | Log <sub>2</sub> FC | p value  |
|----------|-------------------------------------------------------------------------------------|---------------------|----------|
| SRSF2    |    | 1.8365              | 3.98E-12 |
| nElavl   |    | 1.65577             | 6.37E-09 |
| SRSF4    |    | 1.60991             | 4.17E-07 |
| CELF4    |    | 1.48712             | 7.37E-07 |
| RBFOX2   |   | 1.29572             | 1.08E-06 |
| CELF     |  | 1.21587             | 1.67E-08 |
| SRSF1    |  | 1.17189             | 1.89E-12 |
| FMR1     |  | 1.15369             | 2.28E-07 |
| CPSF6    |  | 1.05479             | 2.71E-08 |
| EZH2     |  | 1.01599             | 2.02E-09 |

**Supplementary Fig.8** Putative RBPs and their 3'UTR binding motifs enriched in the of high TE genes in mouse MII oocytes. One-sided t-test.

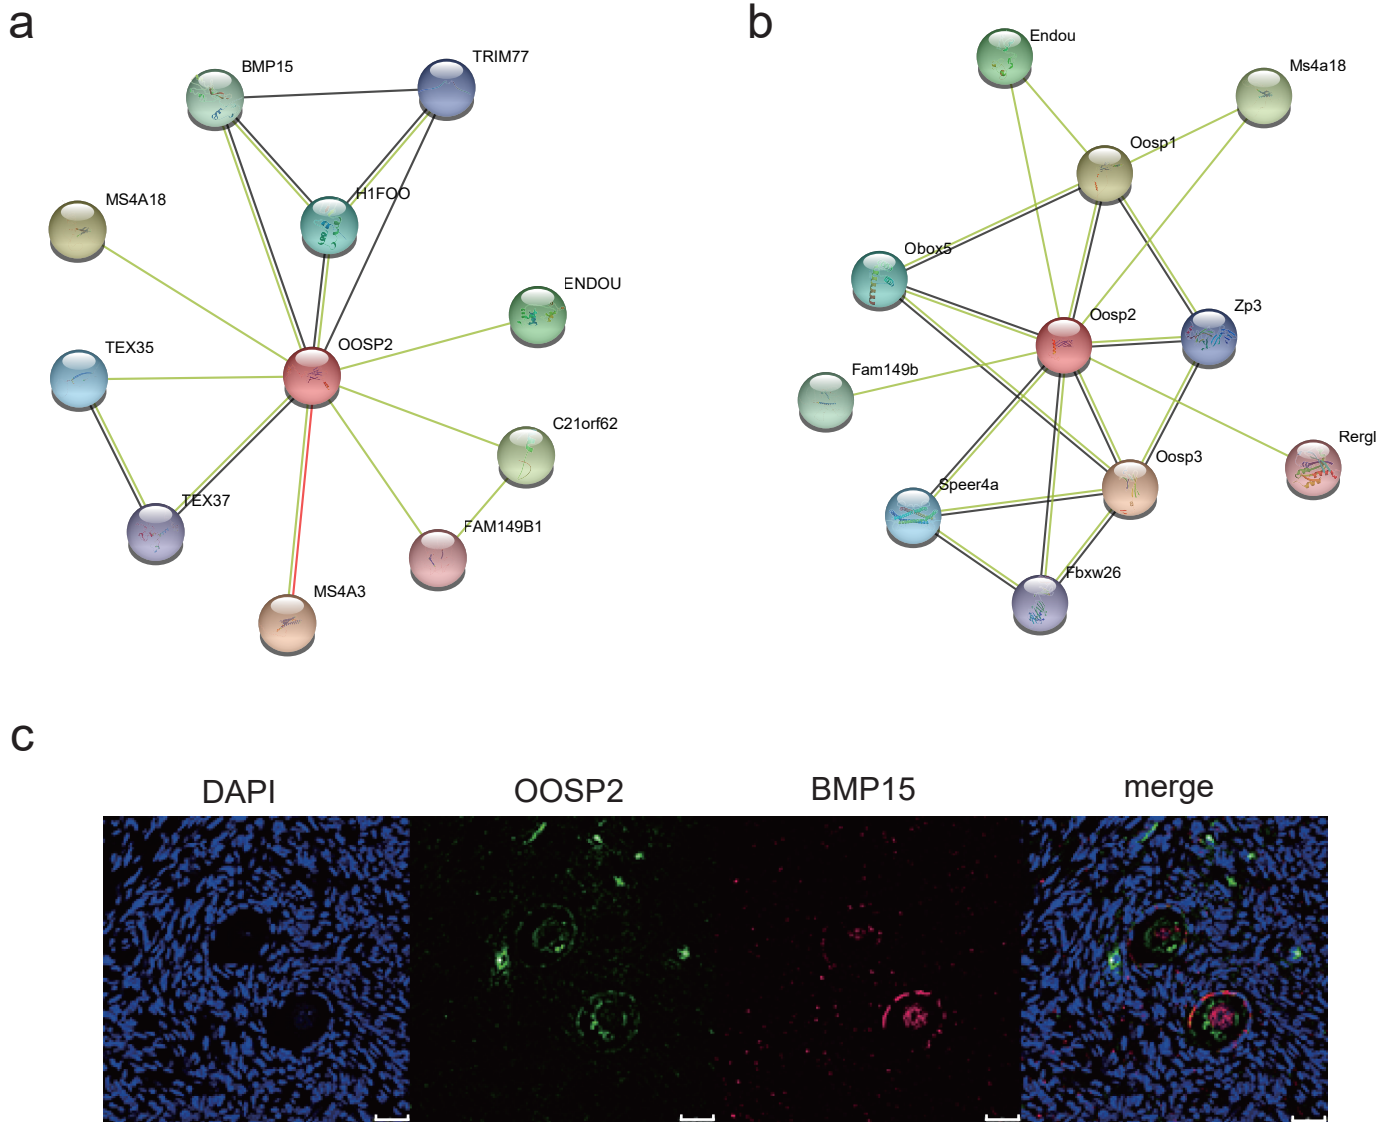

**Supplementary Fig.9** Protein-protein interaction analysis (STRING analysis) and immunostaining of OOSP2 in human ovary. (a) Network of human OOSP2. (b) Network of mouse Oosp2. (c) Immunofluorescence staining of human ovary with OOSP2 (1:200) and BMP15 (1:200) antibody. Two independent experiments show the same result.

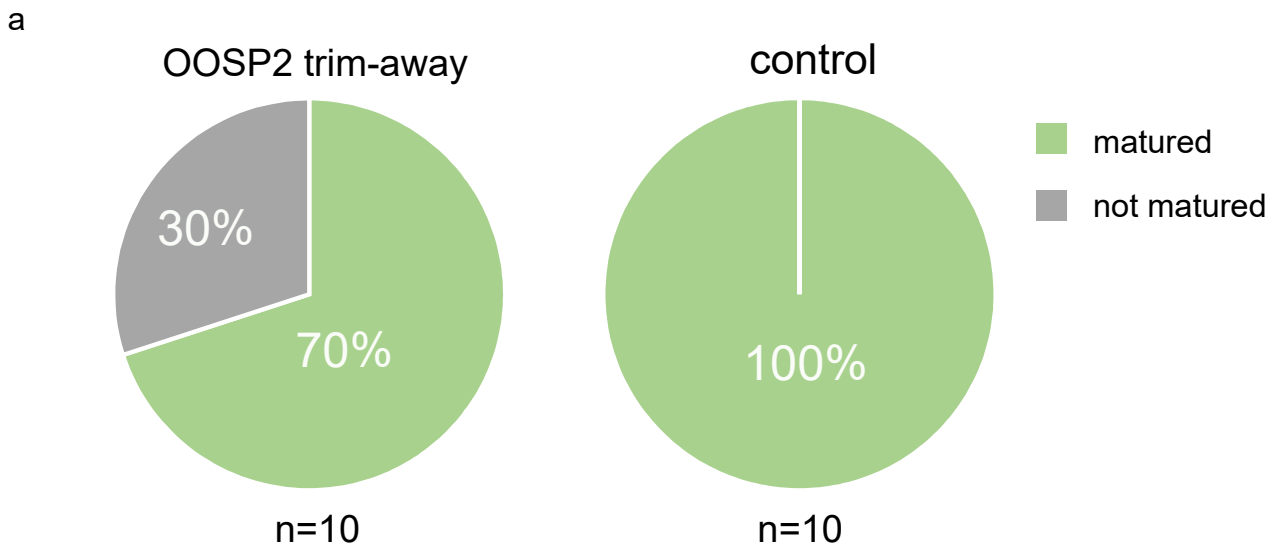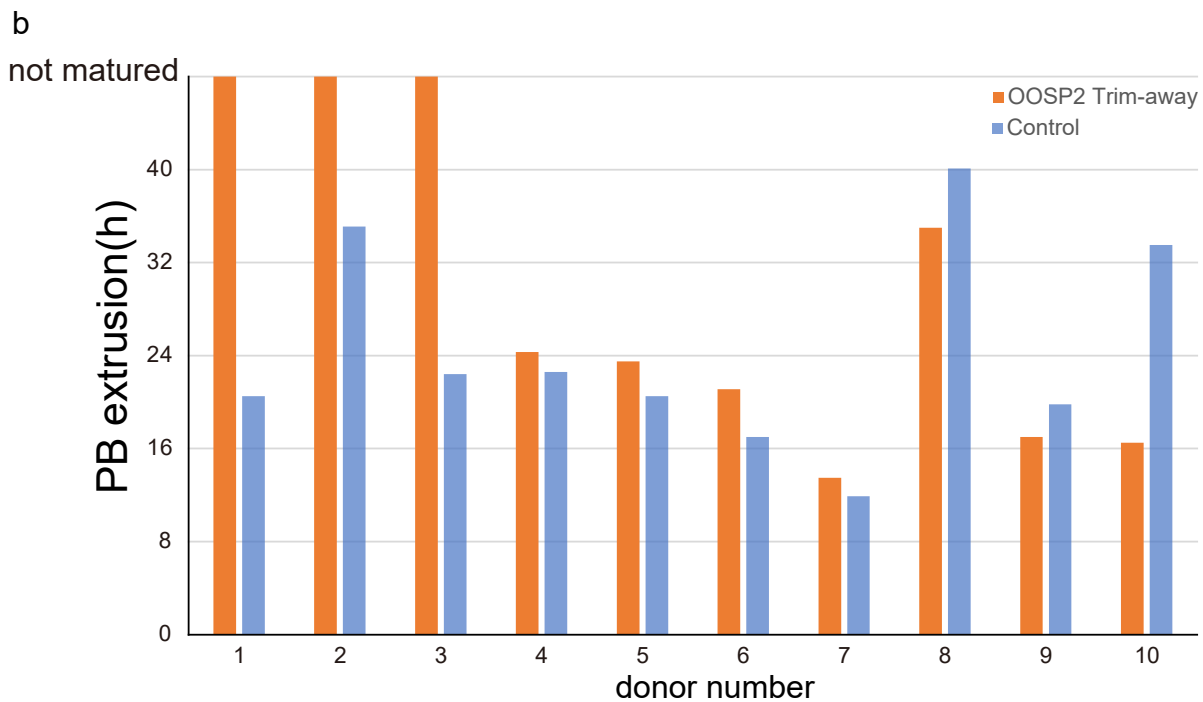

**Supplementary Fig.10** Validating OOSP2 maturation effect on human GV oocytes using TRIM-away methods. (a) Maturation rate of human GV oocytes by timelapse observation between OOSP2 Trim-away group and control group. Comparison was conducted by using pairwise GV oocytes from the same donors. (b) Comparison of PBE (PB exclusion) of OOSP2 Trim-away group and control group.

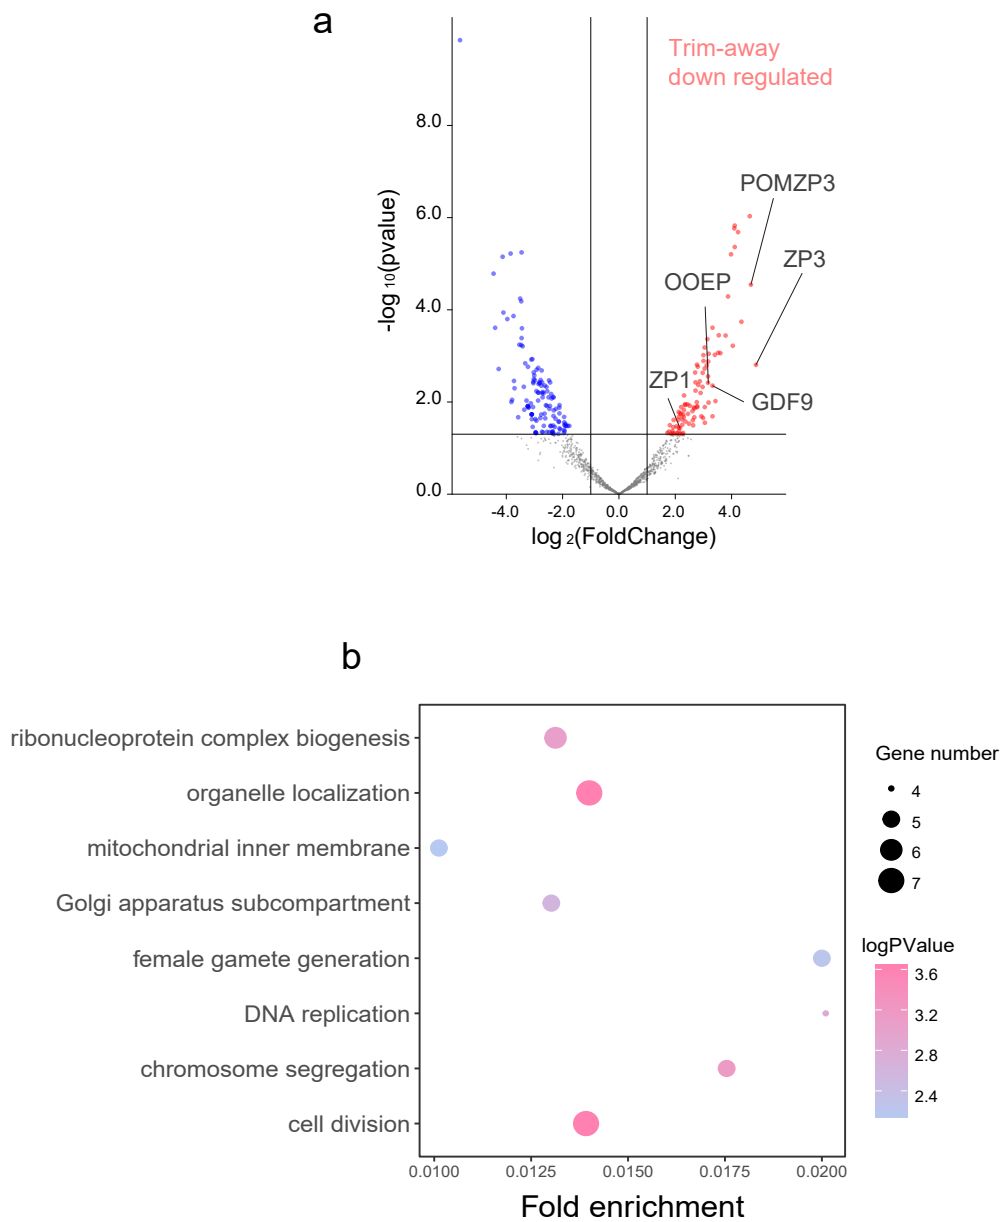

**Supplementary Fig.11** Translatome DEGs of OOSP2 Trim-away versus control oocytes. (a) Volcano plot showing the DEGs after OOSP2 Trim-away. Some downregulated genes are highlighted, including ZP1, GDF9, OOEP, ZP3, and POMZP3 (p value, Wald test). (b) GO analysis showing the terms the enriched down-regulated genes after OOSP2 Trim-away. (p value, hypergeometric test).

a

### small GTPase signaling pathway

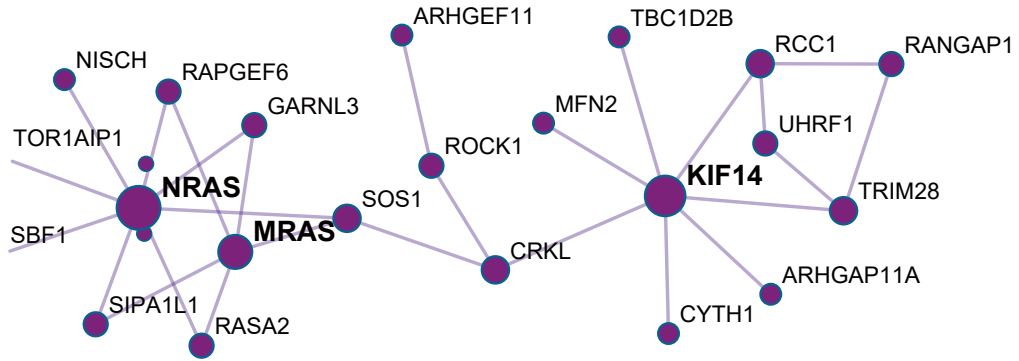

b

### organelle localization

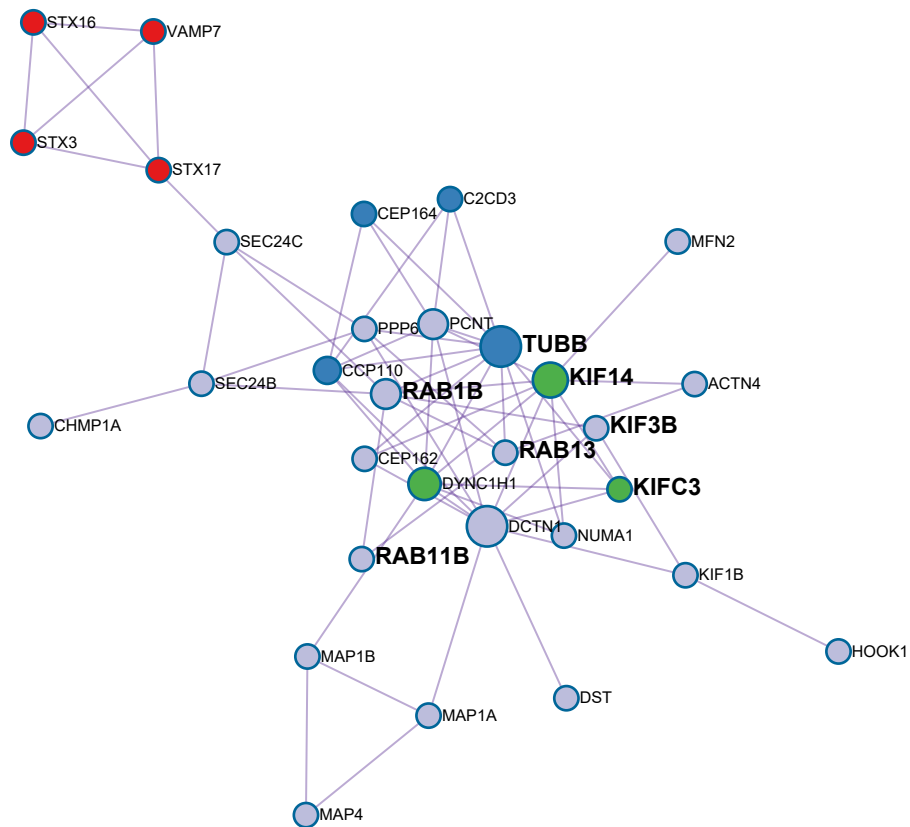

**Supplementary Fig.12** Protein-protein interaction network analysis of genes upregulated by recombinant OOSP2 in human GV oocytes. (a) “small GTPase signaling pathway”, (b) “organelle localization”. Colors represents different MCODEs (see methods).
